# Supplementary material for: Apixaban following discharge in hospitalised adults with COVID-19: Preliminary results from a multicentre, open-label, randomised controlled platform clinical trial
Source: bioRxiv or medRxiv preprint supplement (doi:10.1101/2022.12.07.22283175), 2022-12-07
Supplement: Supplementary file [file media-1.pdf]

**Supplemental Table 1 – Timing of thromboembolic and bleeding events that were a primary cause of hospital admission**

| <b>Cardiovascular</b>        | <b>Apixaban</b> | <b>SoC</b>     |
|------------------------------|-----------------|----------------|
| Myocardial infarction        | 4               | 0              |
| <i>Timing</i>                | <i>day 53</i>   |                |
|                              | <i>day 78</i>   |                |
|                              | <i>day 101</i>  |                |
|                              | <i>day 142</i>  |                |
| Cerebral infarction          | 0               | 2              |
| <i>Timing</i>                |                 | <i>day 230</i> |
|                              |                 | <i>day 312</i> |
| Pulmonary embolism           | 1               | 4              |
| <i>Timing</i>                |                 | <i>day 9</i>   |
|                              |                 | <i>day 11</i>  |
|                              |                 | <i>day 17</i>  |
|                              | <i>day 187</i>  | <i>day 19</i>  |
|                              |                 |                |
| Cerebral haemorrhage         | 0               | 1              |
| <i>Timing</i>                |                 | <i>day 27</i>  |
| <b>Respiratory</b>           | <b>Apixaban</b> | <b>SoC</b>     |
| Haemoptysis                  | 1               | 0              |
| <i>Timing</i>                | <i>day 11</i>   |                |
| <b>Gastrointestinal</b>      | <b>Apixaban</b> | <b>SoC</b>     |
| Gastrointestinal haemorrhage | 1               | 1              |
| <i>Timing</i>                | <i>day 49</i>   | <i>day 353</i> |
